# Supplementary material for: Changes in Social Capital during the COVID-19 Pandemic: Empirical Evidence from Singapore and Switzerland
Source: Atypon-hosted journal article supplement (doi:10.1061/nhrefo.nheng-2034), 2024-07-08
Supplement: supplemental materials_nhrefo.nheng-2034_li.pdf [file supplemental%20materials_nhrefo.nheng-2034_li.pdf]

## SUPPLEMENTAL MATERIALS

*ASCE Natural Hazards Review*

# Changes in Social Capital during the COVID-19 Pandemic: Empirical Evidence from Singapore and Switzerland

Mijie Li, Tingting Wu, Jonas Joerin, and Renate Schubert

**DOI:** 10.1061/NHREFO.NHENG-2034

© ASCE 2024

[www.ascelibrary.org](http://www.ascelibrary.org)

**Table S1.** Changes in horizontal and vertical social capital main indicators during the pandemic (between June 2020 and July 2021) in Singapore (n=3774) and Switzerland (n=4115) respectively.

| Social capital indicators    | Mean scores (SD) |             | Mean difference <sup>a</sup><br>[95% CI] | p-value <sup>b</sup> |
|------------------------------|------------------|-------------|------------------------------------------|----------------------|
|                              | Survey 1         | Survey 2    |                                          |                      |
| <b>Singapore</b>             |                  |             |                                          |                      |
| Horizontal social capital    | 2.76 (0.63)      | 2.96 (0.69) | 0.20*<br>[0.16, 0.24]                    | <0.001               |
| Social cohesion              | 3.38 (0.63)      | 3.56 (0.63) | 0.18*<br>[0.14, 0.22]                    | <0.001               |
| Social network               | 2.54 (0.69)      | 2.78 (0.72) | 0.24*<br>[0.20, 0.29]                    | <0.001               |
| Social support               | 2.38 (0.84)      | 2.55 (0.84) | 0.17*<br>[0.12, 0.23]                    | <0.001               |
| Vertical social capital      | 3.48 (0.71)      | 3.66 (0.69) | 0.18*<br>[0.13, 0.22]                    | <0.001               |
| Ties with government leaders | 3.63 (0.73)      | 3.88 (0.71) | 0.25*<br>[0.20, 0.29]                    | <0.001               |
| Ties with local leaders      | 3.33 (0.79)      | 3.44 (0.81) | 0.11*<br>[0.06, 0.16]                    | <0.001               |
| <b>Switzerland</b>           |                  |             |                                          |                      |
| Horizontal social capital    | 2.77 (0.55)      | 3.01 (0.57) | 0.24*<br>[0.21, 0.28]                    | <0.001               |
| Social cohesion              | 3.42 (0.63)      | 3.69 (0.60) | 0.27*<br>[0.23, 0.31]                    | <0.001 <sup>c</sup>  |
| Social network               | 2.70 (0.66)      | 2.91 (0.67) | 0.21*<br>[0.17, 0.25]                    | <0.001               |
| Social support               | 2.20 (0.75)      | 2.45 (0.78) | 0.25*<br>[0.20, 0.30]                    | <0.001 <sup>c</sup>  |
| Vertical social capital      | 3.46 (0.65)      | 3.48 (0.68) | 0.02<br>[-0.02, 0.06]                    | 0.44                 |
| Ties with government leaders | 3.60 (0.75)      | 3.62 (0.78) | 0.02<br>[-0.03, 0.06]                    | 0.55                 |
| Ties with local leaders      | 3.32 (0.76)      | 3.34 (0.79) | 0.02<br>[-0.03, 0.07]                    | 0.47                 |

Note: SD = standard deviation; CI = confidence interval. Sample sizes were as follows for each wave of survey in Singapore (survey 1, n=1520; survey 2, n=2254) and Switzerland (survey 1, n=1565; survey 2, n=2550) respectively.

<sup>a</sup>Mean difference refers to the mean score in survey 2 minus the mean score in survey 1.

<sup>b</sup>p-value from student's t-test (if samples had equal variances) unless otherwise stated.

<sup>c</sup>p-value from Welch-t-test (if samples had unequal variances).

\*Statistical significance of p<0.05.

**Table S2.** Changes in horizontal and vertical social capital main indicators during the pandemic (between June 2020 and July 2021) in Singapore (n=2742) and Switzerland (n=2505) respectively by collectivistic orientation levels.

| Social capital indicators                     | Mean scores (SD)                            |                                              | p-interaction <sup>c</sup> |
|-----------------------------------------------|---------------------------------------------|----------------------------------------------|----------------------------|
|                                               | Low collectivistic orientation <sup>b</sup> | High collectivistic orientation <sup>b</sup> |                            |
| <b>Singapore</b>                              |                                             |                                              |                            |
| Horizontal social capital                     |                                             |                                              | 0.85                       |
| Survey 1                                      | 2.24 (0.78)                                 | 2.84 (0.62)                                  |                            |
| Survey 2                                      | 2.52 (0.63)                                 | 3.10 (0.64)                                  |                            |
| Change between waves <sup>d</sup><br>[95% CI] | 0.28*<br>[0.10, 0.45]                       | 0.26*<br>[0.21, 0.31]                        |                            |
| Vertical social capital                       |                                             |                                              | <0.001                     |
| Survey 1                                      | 2.48 (0.81)                                 | 3.62 (0.66)                                  |                            |
| Survey 2                                      | 3.14 (0.75)                                 | 3.84 (0.65)                                  |                            |
| Change between waves <sup>d</sup><br>[95% CI] | 0.66*<br>[0.47, 0.84]                       | 0.22*<br>[0.18, 0.28]                        |                            |
| <b>Switzerland</b>                            |                                             |                                              |                            |
| Horizontal social capital                     |                                             |                                              | 0.17                       |
| Survey 1                                      | 2.56 (0.52)                                 | 2.94 (0.56)                                  |                            |
| Survey 2                                      | 2.75 (0.52)                                 | 3.20 (0.60)                                  |                            |
| Change between waves <sup>d</sup><br>[95% CI] | 0.19*<br>[0.12, 0.26]                       | 0.26*<br>[0.20, 0.32]                        |                            |
| Vertical social capital                       |                                             |                                              | 0.16                       |
| Survey 1                                      | 3.24 (0.66)                                 | 3.62 (0.64)                                  |                            |
| Survey 2                                      | 3.22 (0.67)                                 | 3.68 (0.68)                                  |                            |
| Change between waves <sup>d</sup><br>[95% CI] | -0.02<br>[-0.10, 0.06]                      | 0.06<br>[-0.01, 0.13]                        |                            |

Note: SD = standard deviation; CI = confidence interval. Sample sizes were as follows for each wave of survey in Singapore (low collectivistic orientation, n=262; high collectivistic orientation, n=2480) and Switzerland (low collectivistic orientation, n=1067; high collectivistic orientation, n=1438) respectively.

<sup>a</sup>Collectivistic orientation defined as “work for the common good” and “stand together for our nation”.

<sup>b</sup>High or low collectivistic orientation refers to respondents with mean scores of  $\geq 4$  or  $< 3$  respectively. Respondents with mean scores of  $\geq 3$  to  $< 4$  were excluded from analyses.

<sup>c</sup>p-value to indicate the significance of interaction term between collectivistic orientation and time of survey (independent variables) on social capital indicator (dependent variable) from two-way ANOVA.

<sup>d</sup>Changes in horizontal social capital or vertical social capital are based on comparisons of differences in means between waves (survey 2 minus survey 1) for each level of collectivistic orientation using independent two-sample t-tests. A positive value in the point estimate indicates an increase in social capital over time, whereas a negative value indicates a decrease in social capital over time.

\*Statistical significance of  $p < 0.05$ .

**Table S3.** Changes in horizontal and vertical social capital (SC) during the pandemic (between June 2020 and July 2021) in Singapore (n=3774) by age groups and in Switzerland (n=4115) by primarily spoken national language groups.

| Demographic groups                        | Changes between waves <sup>a</sup><br>(95% CI) |                        |
|-------------------------------------------|------------------------------------------------|------------------------|
|                                           | Horizontal SC                                  | Vertical SC            |
| <b>Singapore</b>                          |                                                |                        |
| Age groups (years)                        |                                                |                        |
| 20-29<br>(n=836)                          | 0.19*<br>(0.07, 0.31)                          | 0.17*<br>(0.04, 0.30)  |
| 30-39<br>(n=1008)                         | 0.29*<br>(0.18, 0.39)                          | 0.21*<br>(0.09, 0.33)  |
| 40-49<br>(n=833)                          | 0.12*<br>(0.01, 0.23)                          | 0.07<br>(-0.06, 0.19)  |
| 50-59<br>(n=724)                          | 0.09<br>(-0.03, 0.21)                          | 0.17*<br>(0.04, 0.31)  |
| ≥60<br>(n=373)                            | 0.34*<br>(0.17, 0.51)                          | 0.37*<br>(0.19, 0.56)  |
| <b>Switzerland</b>                        |                                                |                        |
| Primarily spoken national language groups |                                                |                        |
| German<br>(n=2813)                        | 0.23*<br>(0.18, 0.29)                          | -0.01<br>(-0.08, 0.05) |
| French<br>(n=1074)                        | 0.26*<br>(0.18, 0.34)                          | 0.03<br>(-0.06, 0.13)  |
| Italian<br>(n=228)                        | 0.31*<br>(0.13, 0.50)                          | 0.26*<br>(0.05, 0.48)  |

Note: CI = Confidence interval.

<sup>a</sup>Changes in horizontal social capital or vertical social capital are based on comparisons of differences in means between waves (survey 2 minus survey 1) for each level of age group (or each level of primarily spoken national language group) using independent two-sample t-tests. A positive value in the point estimate indicates an increase in social capital over time, whereas a negative value indicates a decrease in social capital over time.

\*Statistical significance of p<0.05.
